# Supplementary material for: On the Evolution of the Optimal Design of WDS: Shifting towards the Use of a Fractal Criterion
Source: MDPI journal article supplement (doi:10.3390/w14233795), 2022-11-22
Supplement: s1 [file s1]

**Supplementary Materials for**  
**On the Evolution of the Optimal Design of WDS: Shifting towards the Use of a Fractal Criterion**

Juan Saldarriaga <sup>1</sup>, Camilo Salcedo <sup>2</sup>, María Alejandra González <sup>1</sup>, Catalina Ortiz <sup>3</sup>, Federico Wiesner <sup>3</sup>  
and Santiago Gómez <sup>3</sup>

<sup>1</sup> Department of Civil and Environmental Engineering, Universidad de los Andes, Bogotá 111711, Colombia

<sup>2</sup> Department of Civil & Architectural Engineering & Mechanics, University of Arizona, Tucson, AZ 85721, USA

<sup>3</sup> Water Supply and Sewer Systems Research Center (CIACUA), Universidad de los Andes, Bogotá 111711, Colombia

**OPUS/NSGA-II RESULTS**

To determine the fractal dimension of each of the four analyzed networks, the results obtained in the pareto front of the OPUS/NSGA-II methodology were implemented. Initially, three points of the net were used, the ones at each end and its *knee*. The names used in the paper for each point are: min(C), min(NRI), knee(C), knee(C), max(C), max(NRI).

Within the procedure performed to obtain the Pareto Front of the OPUS/NSGA-II methodology, different iterations were carried out. For Hanoi and Fossolo 30 iterations were performed, while for Balerna and Modena one iteration was performed. The tables S1, S2, S3 and S4 present the three points (min(C), min(NRI), knee(C), knee(C), max(C), max(NRI)) of the Pareto Front that were chosen for each iteration. This choice of points was made with a procedure that is described in detail in the paper.

**Table S1.** Hanoi, [min(C), min(NRI)], [knee(C), knee(C)], [max(C), max(NRI)] individual choices for analysis of optimal WDS configurations obtained through the OPUS/NSGA-II Methodology.

| No. of iterations | Hanoi: Sample points characteristics |         |                          |         |                         |         |
|-------------------|--------------------------------------|---------|--------------------------|---------|-------------------------|---------|
|                   | 1. [Min (C), Min (NRI)]              |         | 2. [Knee (C), Knee(NRI)] |         | 3. [Max (C), Max (NRI)] |         |
|                   | Cost (\$)                            | NRI (—) | Cost (\$)                | NRI (—) | Cost (\$)               | NRI (—) |
| <b>1</b>          | 6604006.5000                         | 0.2508  | 7529688.7500             | 0.3145  | 10969798.0000           | 0.3538  |
| <b>2</b>          | 6487837.5000                         | 0.2433  | 7273868.2500             | 0.3047  | 10969798.0000           | 0.3538  |
| <b>3</b>          | 6412326.5000                         | 0.2228  | 7176011.0000             | 0.2993  | 10969798.0000           | 0.3538  |
| <b>4</b>          | 6457547.0000                         | 0.2417  | 7273595.7500             | 0.3048  | 10969798.0000           | 0.3538  |
| <b>5</b>          | 6426680.5000                         | 0.2344  | 7307810.5000             | 0.3055  | 10969798.0000           | 0.3538  |
| <b>6</b>          | 6320244.5000                         | 0.2118  | 7132225.5000             | 0.2976  | 10969798.0000           | 0.3538  |
| <b>7</b>          | 6354539.5000                         | 0.2307  | 7194142.7500             | 0.3000  | 10969798.0000           | 0.3538  |
| <b>8</b>          | 6381262.0000                         | 0.2302  | 7219875.7500             | 0.3017  | 10969798.0000           | 0.3538  |
| <b>9</b>          | 6501110.0000                         | 0.2460  | 7280724.0000             | 0.3050  | 10969798.0000           | 0.3538  |
| <b>10</b>         | 6499414.5000                         | 0.2408  | 7282336.2500             | 0.3047  | 10969798.0000           | 0.3538  |
| <b>11</b>         | 6449511.0000                         | 0.2437  | 7299840.2500             | 0.3058  | 10969798.0000           | 0.3538  |
| <b>12</b>         | 6307711.5000                         | 0.2175  | 7217912.7500             | 0.3004  | 10969798.0000           | 0.3538  |
| <b>13</b>         | 6081151.0000                         | 0.1756  | 6911245.5000             | 0.2838  | 10969798.0000           | 0.3538  |

| No. of iterations | Hanoi: Sample points characteristics |         |                          |         |                         |         |
|-------------------|--------------------------------------|---------|--------------------------|---------|-------------------------|---------|
|                   | 1. [Min (C), Min (NRI)]              |         | 2. [Knee (C), Knee(NRI)] |         | 3. [Max (C), Max (NRI)] |         |
|                   | Cost (\$)                            | NRI (—) | Cost (\$)                | NRI (—) | Cost (\$)               | NRI (—) |
| 14                | 6461788.5000                         | 0.2340  | 7283245.5000             | 0.3045  | 10969798.0000           | 0.3538  |
| 15                | 6553108.5000                         | 0.2534  | 7362807.2500             | 0.3086  | 10969798.0000           | 0.3538  |
| 16                | 6437176.0000                         | 0.2248  | 7201723.7500             | 0.3006  | 10969798.0000           | 0.3538  |
| 17                | 6553108.5000                         | 0.2537  | 7405071.7500             | 0.3106  | 10969798.0000           | 0.3538  |
| 18                | 6371998.5000                         | 0.2196  | 7196055.7500             | 0.3007  | 10969798.0000           | 0.3538  |
| 19                | 6487837.5000                         | 0.2433  | 7254115.5000             | 0.3042  | 10969798.0000           | 0.3538  |
| 20                | 6370242.5000                         | 0.2253  | 7181676.5000             | 0.2998  | 10969798.0000           | 0.3538  |
| 21                | 6448901.5000                         | 0.2437  | 7311294.2500             | 0.3063  | 10969798.0000           | 0.3538  |
| 22                | 6448901.5000                         | 0.2435  | 7321335.2500             | 0.3069  | 10969798.0000           | 0.3538  |
| 23                | 6462510.0000                         | 0.2410  | 7284895.0000             | 0.3055  | 10969798.0000           | 0.3538  |
| 24                | 6437584.0000                         | 0.2428  | 7343579.7500             | 0.3075  | 10969798.0000           | 0.3538  |
| 25                | 6487837.5000                         | 0.2433  | 7288509.7500             | 0.3055  | 10969798.0000           | 0.3538  |
| 26                | 6439320.5000                         | 0.2223  | 7193271.2500             | 0.3002  | 10969798.0000           | 0.3538  |
| 27                | 6428073.0000                         | 0.2384  | 7242831.7500             | 0.3033  | 10969798.0000           | 0.3538  |
| 28                | 6428073.0000                         | 0.2384  | 7242831.7500             | 0.3033  | 10969798.0000           | 0.3538  |
| 29                | 6492103.5000                         | 0.2442  | 7213946.0000             | 0.3018  | 10969798.0000           | 0.3538  |
| 30                | 6604006.5000                         | 0.2508  | 7531605.2500             | 0.3145  | 10969798.0000           | 0.3538  |

**Table S2.** Balerma, [min(C), min(NRI)], [knee(C), knee(C)], [max(C), max(NRI)] individual for analysis of optimal WDS configurations obtained through the OPUS/NSGA-II Methodology

| No. Of iterations | Balerma: Sample points characteristics |         |                          |         |                         |         |
|-------------------|----------------------------------------|---------|--------------------------|---------|-------------------------|---------|
|                   | 1. [Min (C), Min (NRI)]                |         | 2. [Knee (C), Knee(NRI)] |         | 3. [Max (C), Max (NRI)] |         |
|                   | Cost (\$)                              | NRI (—) | Cost (\$)                | NRI (—) | Cost (\$)               | NRI (—) |
| 1                 | 2288460.00                             | 0.4312  | 2807753.8750             | 0.7189  | 13191652.0000           | 0.8913  |

**Table S3.** Modena, [min(C), min(NRI)], [knee(C), knee(C)], [max(C), max(NRI)] individual for analysis of optimal WDS configurations obtained through the OPUS/NSGA-II Methodology

| No. Of iterations | Modena: Sample points characteristics |         |                          |         |                         |         |
|-------------------|---------------------------------------|---------|--------------------------|---------|-------------------------|---------|
|                   | 1. [Min (C), Min (NRI)]               |         | 2. [Knee (C), Knee(NRI)] |         | 3. [Max (C), Max (NRI)] |         |
|                   | Cost (\$)                             | NRI (—) | Cost (\$)                | NRI (—) | Cost (\$)               | NRI (—) |
| 1                 | 2613550                               | 0.3607  | 3089301.75               | 0.7302  | 6731936                 | 0.9073  |

**Table S4.** Fossolo, [min(C), min(NRI)], [knee(C), knee(C)], [max(C), max(NRI)] individual for analysis of optimal WDS configurations obtained through the OPUS/NSGA-II Methodology

| No. of iterations | Fossolo: Sample points characteristics |         |                          |         |                         |         |
|-------------------|----------------------------------------|---------|--------------------------|---------|-------------------------|---------|
|                   | 1. [Min (C), Min (NRI)]                |         | 2. [Knee (C), Knee(NRI)] |         | 3. [Max (C), Max (NRI)] |         |
|                   | Cost (\$)                              | NRI (—) | Cost (\$)                | NRI (—) | Cost (\$)               | NRI (—) |
| 1                 | 22278.7773                             | 0.2590  | 41792.7383               | 0.6831  | 1661922.5000            | 0.99979 |

| No. of iterations | Fossolo: Sample points characteristics |         |                          |         |                         |         |
|-------------------|----------------------------------------|---------|--------------------------|---------|-------------------------|---------|
|                   | 1. [Min (C), Min (NRI)]                |         | 2. [Knee (C), Knee(NRI)] |         | 3. [Max (C), Max (NRI)] |         |
|                   | Cost (\$)                              | NRI (—) | Cost (\$)                | NRI (—) | Cost (\$)               | NRI (—) |
| 2                 | 24819.5234                             | 0.3347  | 43982.4063               | 0.7094  | 1661922.5000            | 0.99979 |
| 3                 | 22782.4668                             | 0.3545  | 41723.3926               | 0.7133  | 1661922.5000            | 0.99979 |
| 4                 | 22784.1289                             | 0.3345  | 43877.1387               | 0.7050  | 1661922.5000            | 0.99979 |
| 5                 | 23001.8652                             | 0.3263  | 43234.4063               | 0.7053  | 1661922.5000            | 0.99979 |
| 6                 | 23144.8340                             | 0.3059  | 44846.5137               | 0.6993  | 1661922.5000            | 0.99979 |
| 7                 | 22514.2988                             | 0.3153  | 45468.7402               | 0.7096  | 1661922.5000            | 0.99979 |
| 8                 | 22889.5215                             | 0.3015  | 42006.8066               | 0.6814  | 1661922.5000            | 0.99979 |
| 9                 | 23046.9844                             | 0.2948  | 41504.4355               | 0.6952  | 1661922.5000            | 0.99979 |
| 10                | 22701.6426                             | 0.2964  | 44029.0078               | 0.7012  | 1661922.5000            | 0.99979 |
| 11                | 22903.2773                             | 0.3140  | 45237.7930               | 0.7106  | 1661922.5000            | 0.99979 |
| 12                | 22284.8691                             | 0.3159  | 41967.5898               | 0.6962  | 1661922.5000            | 0.99979 |
| 13                | 23262.5586                             | 0.3269  | 44075.3105               | 0.7136  | 1661922.5000            | 0.99979 |
| 14                | 23187.9453                             | 0.2860  | 40568.4707               | 0.6802  | 1661922.5000            | 0.99979 |
| 15                | 22992.4570                             | 0.2990  | 43738.6582               | 0.6958  | 1661922.5000            | 0.99979 |
| 16                | 25038.6211                             | 0.2717  | 44455.0625               | 0.6970  | 1661922.5000            | 0.99979 |
| 17                | 22314.6074                             | 0.3194  | 41204.8184               | 0.6991  | 1661922.5000            | 0.99979 |
| 18                | 21410.6426                             | 0.3019  | 42535.8926               | 0.7008  | 1661922.5000            | 0.99979 |
| 19                | 23107.8438                             | 0.3376  | 43373.7129               | 0.7069  | 1661922.5000            | 0.99979 |
| 20                | 22966.4082                             | 0.2979  | 41629.5879               | 0.6849  | 1661922.5000            | 0.99979 |
| 21                | 22584.7012                             | 0.3216  | 41118.9160               | 0.6928  | 1661922.5000            | 0.99979 |
| 22                | 22917.1523                             | 0.3184  | 42410.4395               | 0.6947  | 1661922.5000            | 0.99979 |
| 23                | 23045.4355                             | 0.3388  | 47027.4727               | 0.7212  | 1661922.5000            | 0.99979 |
| 24                | 21776.3047                             | 0.2967  | 42489.9980               | 0.6855  | 1661922.5000            | 0.99979 |
| 25                | 24081.7852                             | 0.3637  | 46000.4492               | 0.7212  | 1661922.5000            | 0.99979 |
| 26                | 23921.1797                             | 0.2995  | 46846.4160               | 0.7202  | 1661922.5000            | 0.99979 |
| 27                | 23495.2090                             | 0.2881  | 39232.2949               | 0.6811  | 1661922.5000            | 0.99979 |
| 28                | 22525.9102                             | 0.3208  | 41567.8555               | 0.6946  | 1661922.5000            | 0.99979 |
| 29                | 23578.1367                             | 0.3308  | 42873.8730               | 0.7002  | 1661922.5000            | 0.99979 |
| 30                | 24212.9160                             | 0.3738  | 47959.7793               | 0.7220  | 1661922.5000            | 0.99979 |

After selecting the three points of each network, these were plotted to determine the characteristics of the WDS.

Figures S1, S2, S3 and S4 shows the pipe diameter in the final WDS configuration obtained through OPUS/NSGA-II for each network.

**Figure S1.** Hanoi pipe diameter choices in the final WDS configuration obtained through OPUS/NSGA II for the (a) [min(C), min (NRI)] (b) [knee(C), knee(C)] and (c) [max(C), max (NRI)]



**Figure S2.** Balerna pipe diameter choices in the final WDS configuration obtained through OPUS/NSGA II for the  
(a)  $[\min(C), \min(NRI)]$  (b)  $[\text{knee}(C), \text{knee}(NRI)]$  and (c)  $[\max(C), \max(NRI)]$

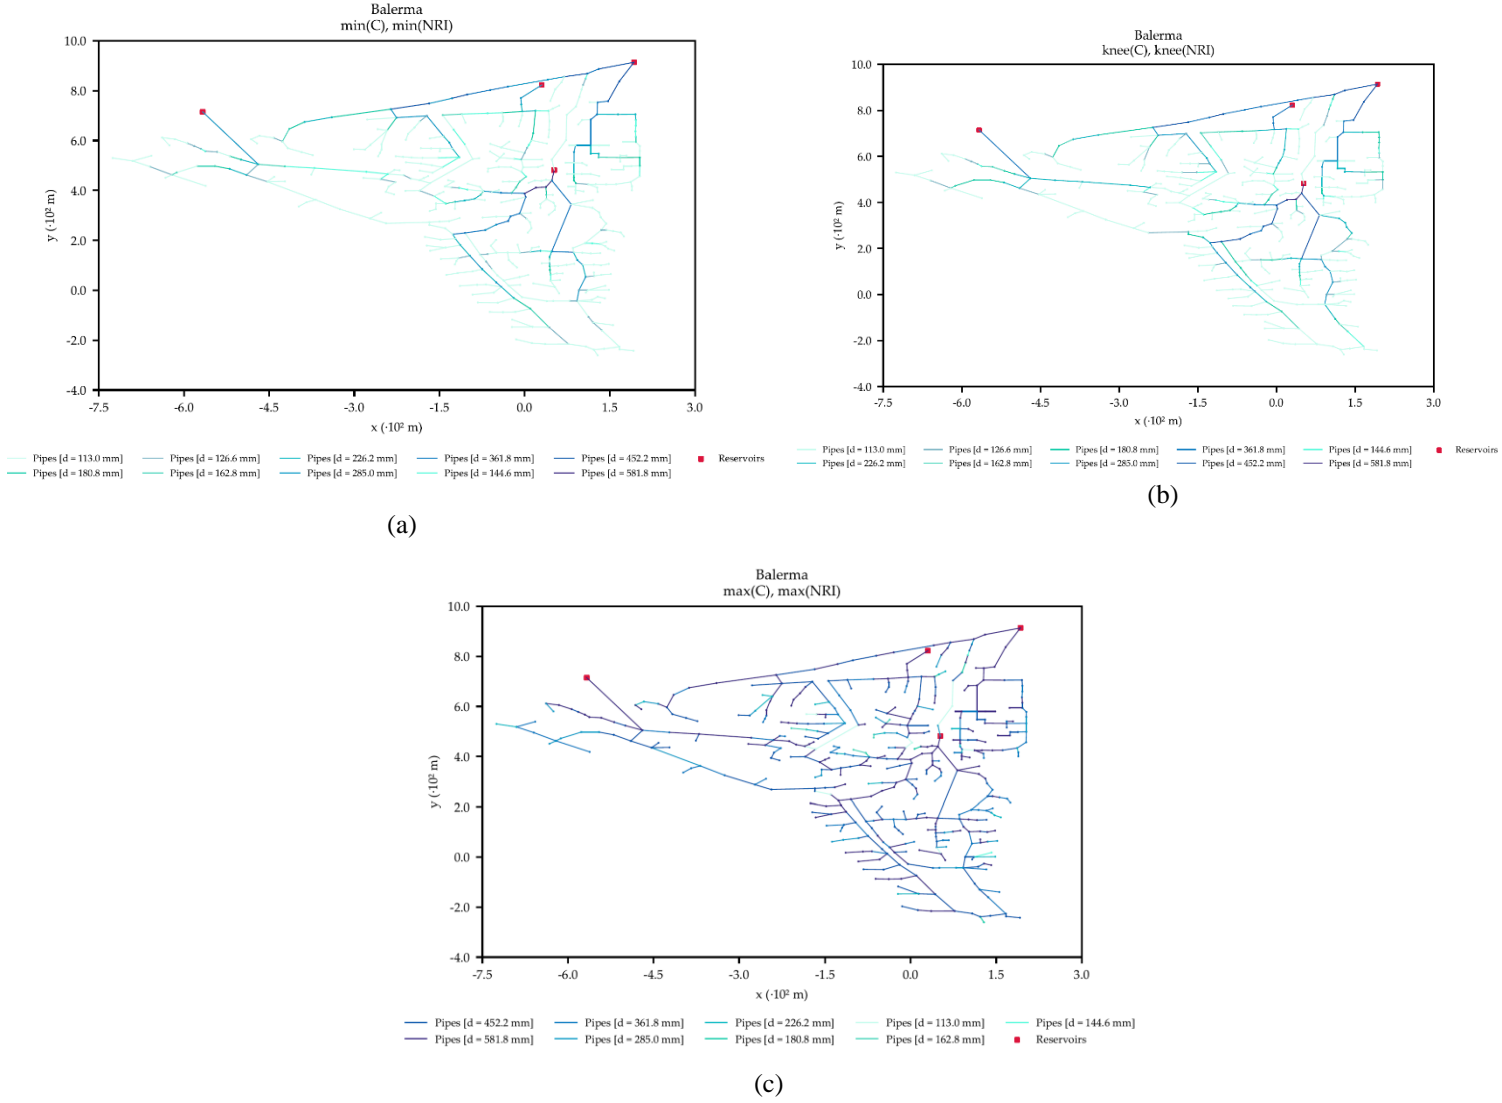

**Figure S3.** Fosolo pipe diameter choices in the final WDS configuration obtained through OPUS/NSGA II for the (a)  $[\min(C), \min(NRI)]$  (b)  $[\text{knee}(C), \text{knee}(NRI)]$  and (c)  $[\max(C), \max(NRI)]$

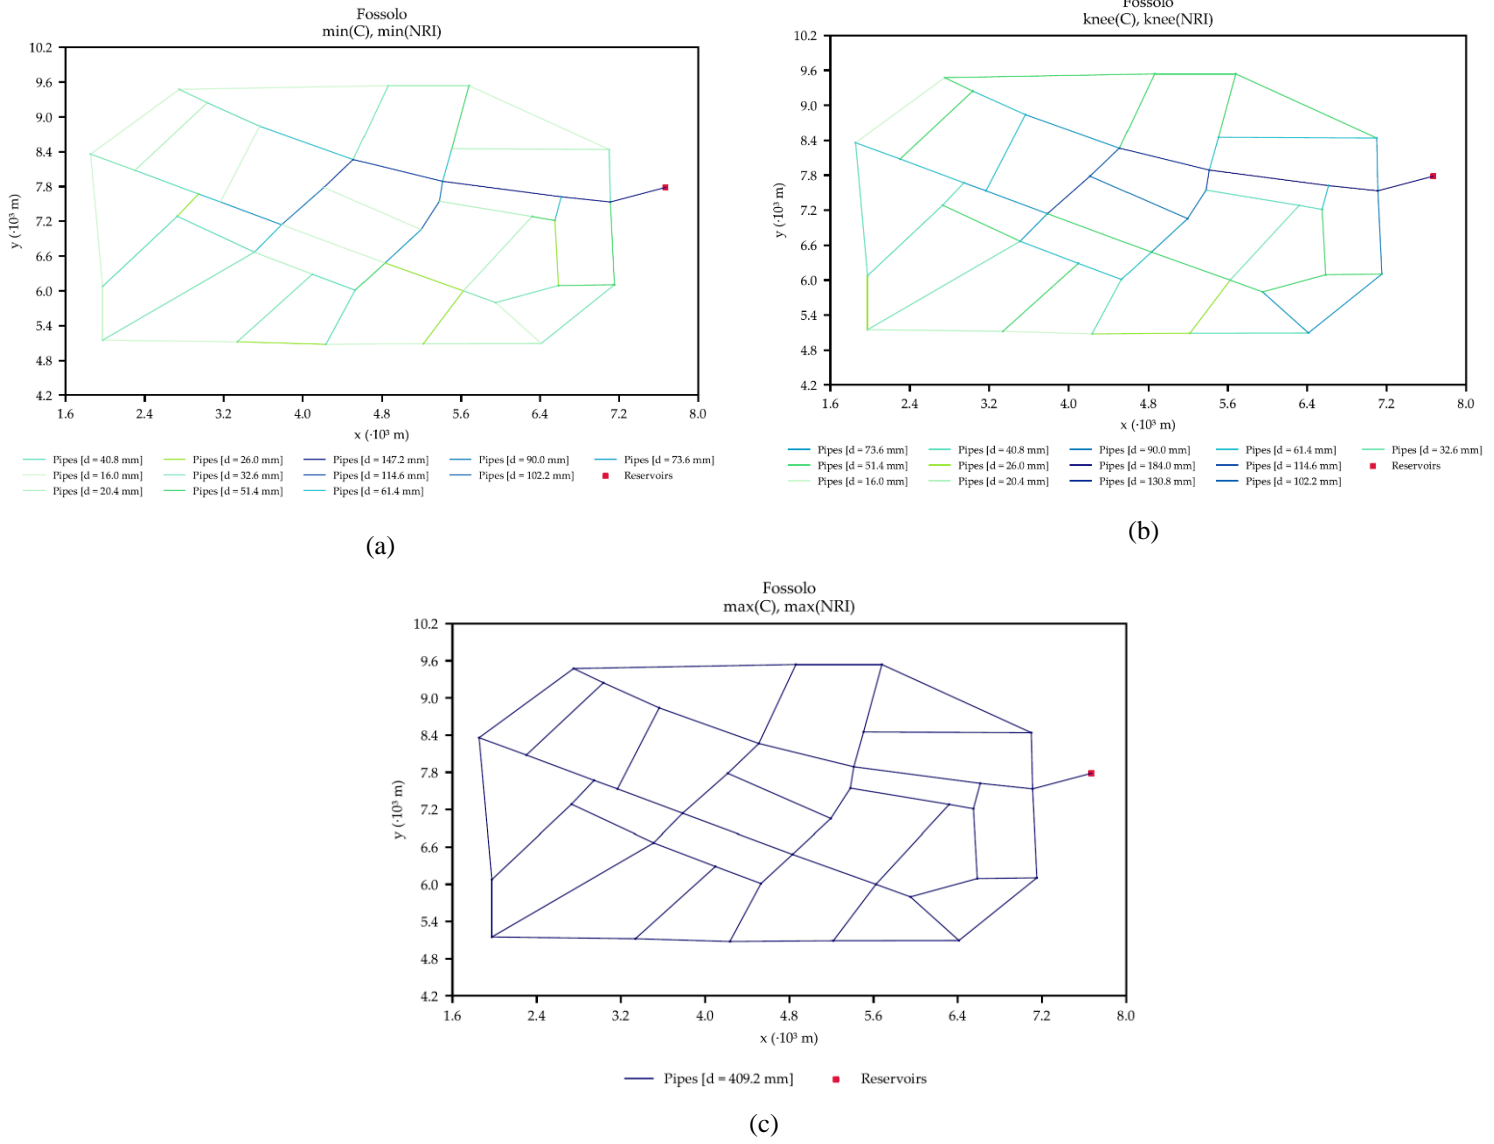

**Figure S4.** Modena pipe diameter choices in the final WDS configuration obtained through OPUS/NSGA II for the (a) [min(C), min (NRI)] (b) [knee(C), knee(C)] and (c) [max(C), max (NRI)]

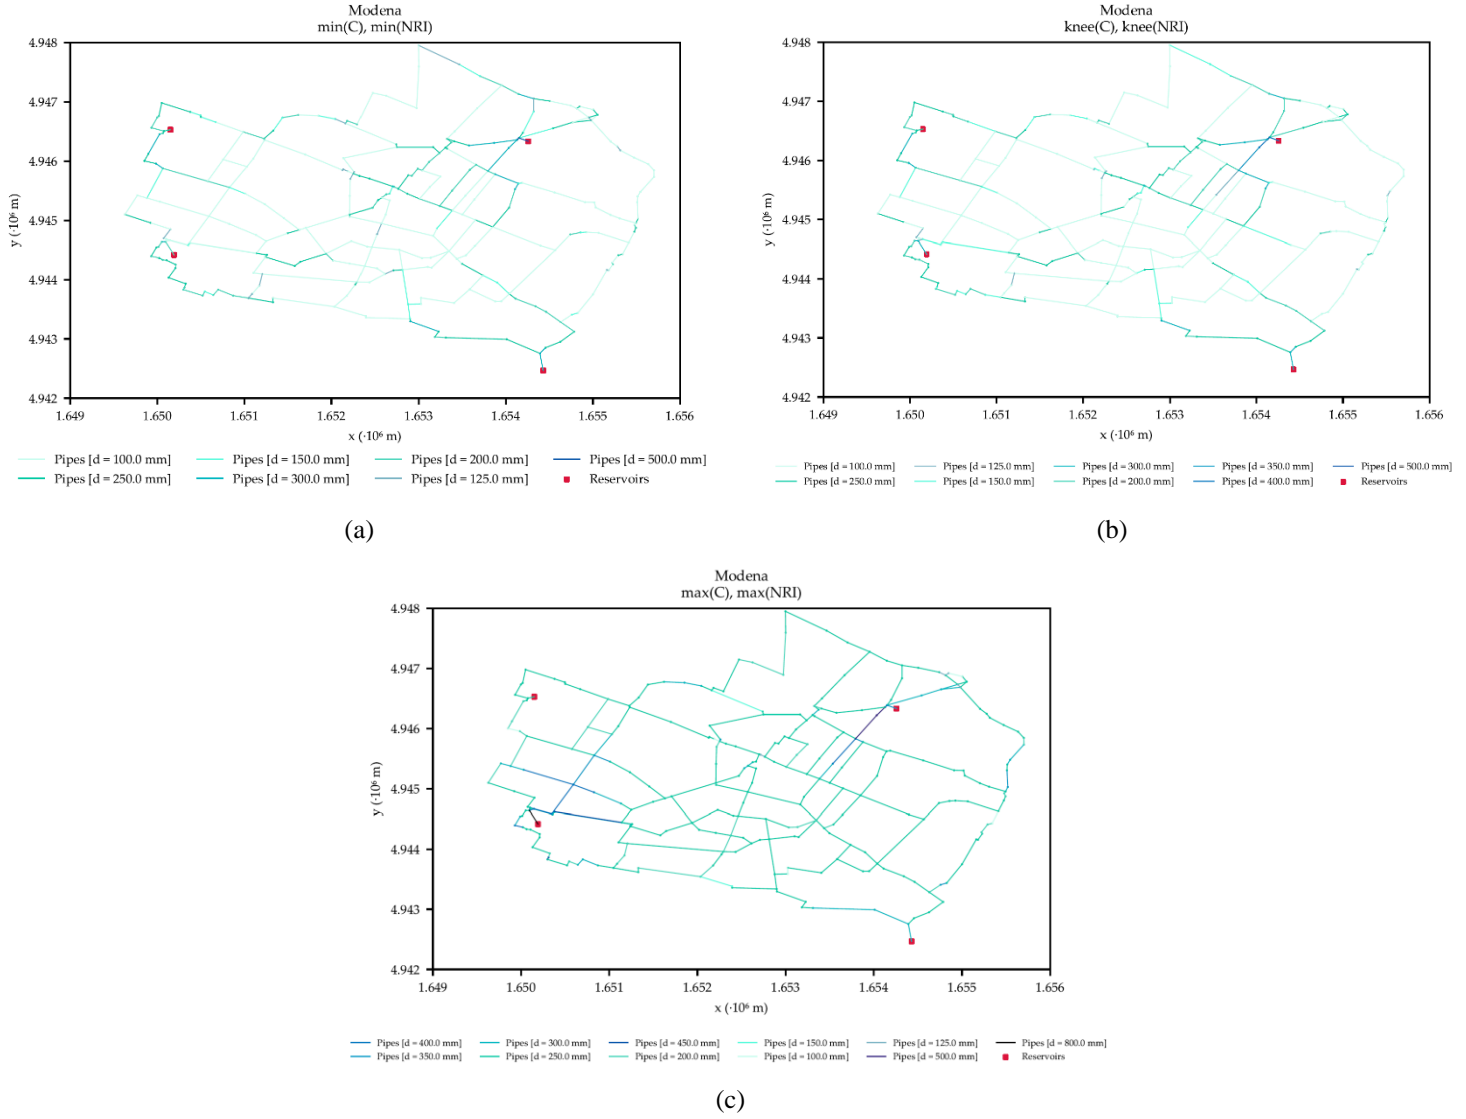

## WATER DISTRIBUTION SYSTEM CLASSIFICATION

After determining the fractal analysis for the three points of each network, the possibility of a relationship between the values found and the type of network was studied. In addition, we wanted to check if the proposed methodology worked better for any specific type of network. For this reason, a methodology for the characterization of distribution systems was implemented. The paper describes the methodology, and the table S5 details the values obtained for each parameter.

**Table S5.** Values of each parameter for the WDS classification.

| <b>WDS</b> | <b>Point</b>      | <b>Nodes (No.)</b> | <b>Links (No.)</b> | <b>e<sub>b</sub></b> | <b>e<sub>r</sub></b> | <b>LD</b> | <b>AND</b> | <b>MC</b> | <b>BI</b> |
|------------|-------------------|--------------------|--------------------|----------------------|----------------------|-----------|------------|-----------|-----------|
| Hanoi      | min(C), min (NRI) | 32                 | 34                 | 7                    | 9                    | 0.0685    | 2.1250     | 0.0508    | 0.4375    |
|            | knee(C), knee(C)  | 32                 | 34                 | 7                    | 9                    | 0.0685    | 2.1250     | 0.0508    | 0.4375    |
|            | max(C), max (NRI) | 32                 | 34                 | 7                    | 9                    | 0.0685    | 2.1250     | 0.0508    | 0.4375    |
| Balerna    | min(C), min (NRI) | 447                | 454                | 292                  | 87                   | 0.0046    | 2.0313     | 0.0090    | 0.7704    |
|            | knee(C), knee(C)  | 447                | 454                | 292                  | 87                   | 0.0046    | 2.0313     | 0.0090    | 0.7704    |
|            | max(C), max (NRI) | 447                | 454                | 292                  | 87                   | 0.0046    | 2.0313     | 0.0090    | 0.7704    |
| Fossolo    | min(C), min (NRI) | 37                 | 58                 | 1                    | 57                   | 0.0871    | 3.1351     | 0.3188    | 0.0172    |
|            | knee(C), knee(C)  | 37                 | 58                 | 1                    | 57                   | 0.0871    | 3.1351     | 0.3188    | 0.0172    |
|            | max(C), max (NRI) | 37                 | 58                 | 1                    | 57                   | 0.0871    | 3.1351     | 0.3188    | 0.0172    |
| Modena     | min(C), min (NRI) | 272                | 317                | 4                    | 117                  | 0.0086    | 2.3309     | 0.0853    | 0.0331    |
|            | knee(C), knee(C)  | 272                | 317                | 4                    | 117                  | 0.0086    | 2.3309     | 0.0853    | 0.0331    |
|            | max(C), max (NRI) | 272                | 317                | 4                    | 117                  | 0.0086    | 2.3309     | 0.0853    | 0.0331    |
